# Supplementary material for: Verteporfin-induced formation of protein cross-linked oligomers and high molecular weight complexes is mediated by light and leads to cell toxicity
Source: PubMed Central journal article supplement (PMC5399488; doi:10.1038/srep46581), 2017-04-21

**Supplemental Information for:**

**Verteporfin-induced formation of protein cross-linked oligomers and high molecular weight complexes is mediated by light and leads to cell toxicity.**

Eleni K. Konstantinou, Shoji Notomi, Cassandra Kosmidou, Katarzyna Brodowska, Ahmad Al.Moujahed, Fotini Nicolaou, Pavlina Tsoka, Evangelos Gragoudas, Joan W. Miller, Lucy H. Young, and Demetrios G. Vavvas

**Supplementary Figure 1. Formation of p62, Diap1 and Rock1 oligomers in MEL 270, HEK 293 and MCF-7 cells when not shielded from light.** Western-blot of protein extracts from cells treated with vehicle (veh.), low dose (LD, 1.25 µg/ml) and high dose (HD, 7.5 µg/ml) of Verteporfin (VP) for 0 and 6 hours in ambient light in all steps (treatment, lysis and electrophoresis).

**Supplementary Figure 2. Light is needed for the formation of LC3 oligomers in MEL 270, HEK-293 and MCF-7 cell lines.** Western-blot of protein extracts from cells treated with vehicle (veh.), low dose (LD, 1.25 µg/ml) or high dose (HD, 7.5 µg/ml) of Verteporfin (VP) for 0 and 6 hours. Right column demonstrates cells that kept in absolute darkness during all steps (treatment, lysis and electrophoresis). Left column demonstrates cells that were kept in darkness only for the duration of treatment with subsequent steps of cell lysis and electrophoresis in ambient light. In this series of western we notice that the expression of LC3 might change following a similar change, which can vary depending in the cell line. More pronounce HMWC formation is noticed in the HEK cells and MCF-7 in light comparing to the MEL270.

**Supplementary Table 1.** Table with abbreviations, explanations and p-values for Figure 8.

Multiple exposures of Figure 4 also provided.

S1.

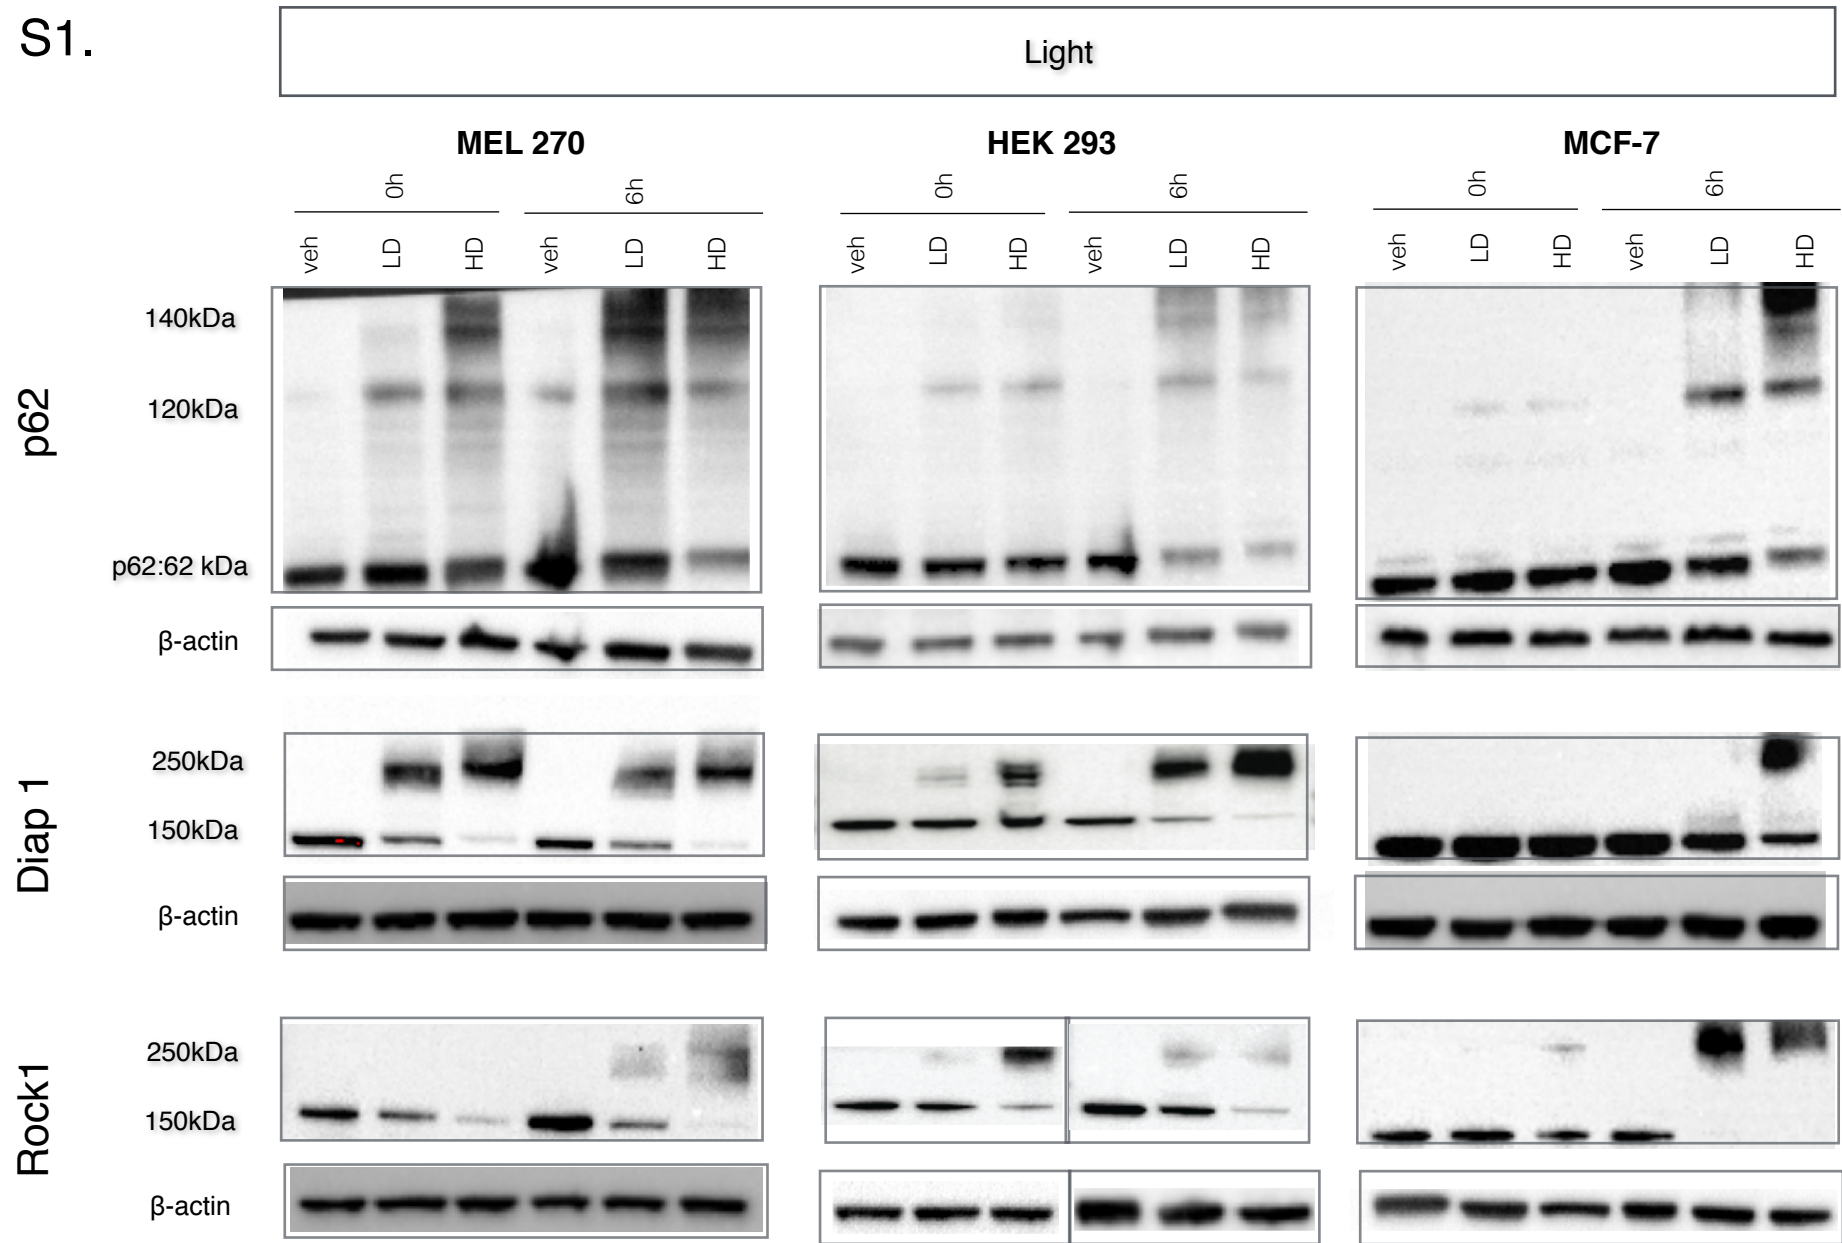

S2.

LC3

MEL 270

LC3A/B:  
14,16kDa

$\beta$ -actin

HEK 293

LC3A/B:  
14,16kDa

$\beta$ -actin

MCF-7

LC3A/B:  
14,16kDa

$\beta$ -actin

Light

0h

6h

veh

LD

HD

veh

LD

HD

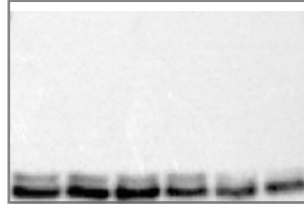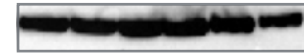

140kDa  
120kDa

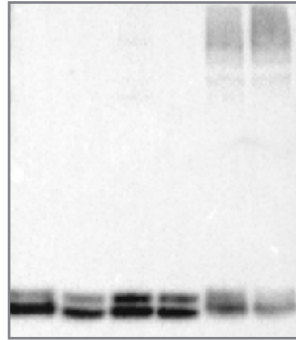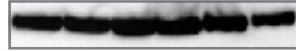

140kDa  
120kDa

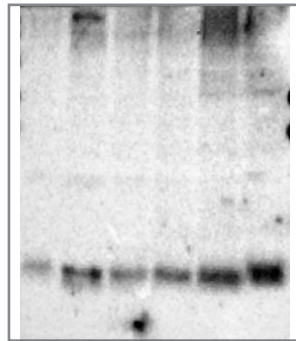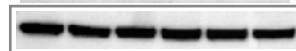

Dark

0h

6h

veh

LD

HD

veh

LD

HD

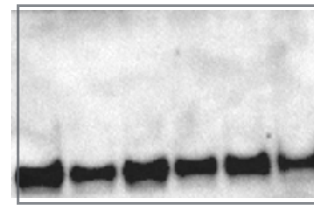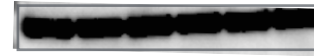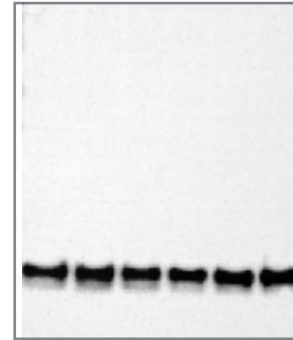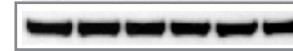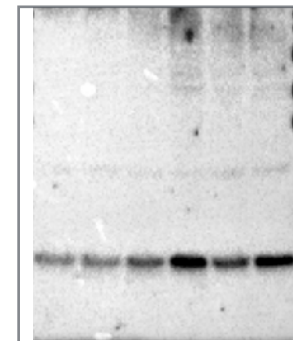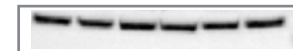

**SupplementaryTable 1.** Table with abbreviations, explanations and p-values for Figure 8.

| Abbreviation      | Explanation                   | Quantification |
|-------------------|-------------------------------|----------------|
| Control           | No dose                       | 0              |
| LD                | Low dose                      | 1.25 µg /ml    |
| HD                | High dose                     | 7.5 µg /ml     |
| MEL 270 - p value | 0h HD dark vs HD light        | 0.00433        |
| MEL 270 - p value | 6h HD dark vs HD light        | 5.08E-16       |
| MEL 270 - p value | 24h HD dark vs HD light       | 3.1723E-0.7    |
| HEK 293 - p value | 0h HD dark vs HD light        | 3.42E-05       |
| HEK 293 - p value | 6h LD dark vs LD light        | 0.00165971     |
| HEK 293 - p value | 6h HD dark vs HD light        | 0.00674024     |
| HEK 293 - p value | 24h HD dark vs HD light       | 6.11E-13       |
| MCF-7 - p value   | 0h HD dark vs HD light        | 0.009          |
| MCF-7 - p value   | 6h LD dark vs LD light        | 0.0187         |
| MCF-7 - p value   | 6h HD dark vs HD light        | 0.000704       |
| MCF-7 - p value   | 24h HD dark vs HD light       | 0.00108        |
| ns                | non statistically significant | >0.05          |

**Fig. 4 (1/2) multiple exposures**

6h

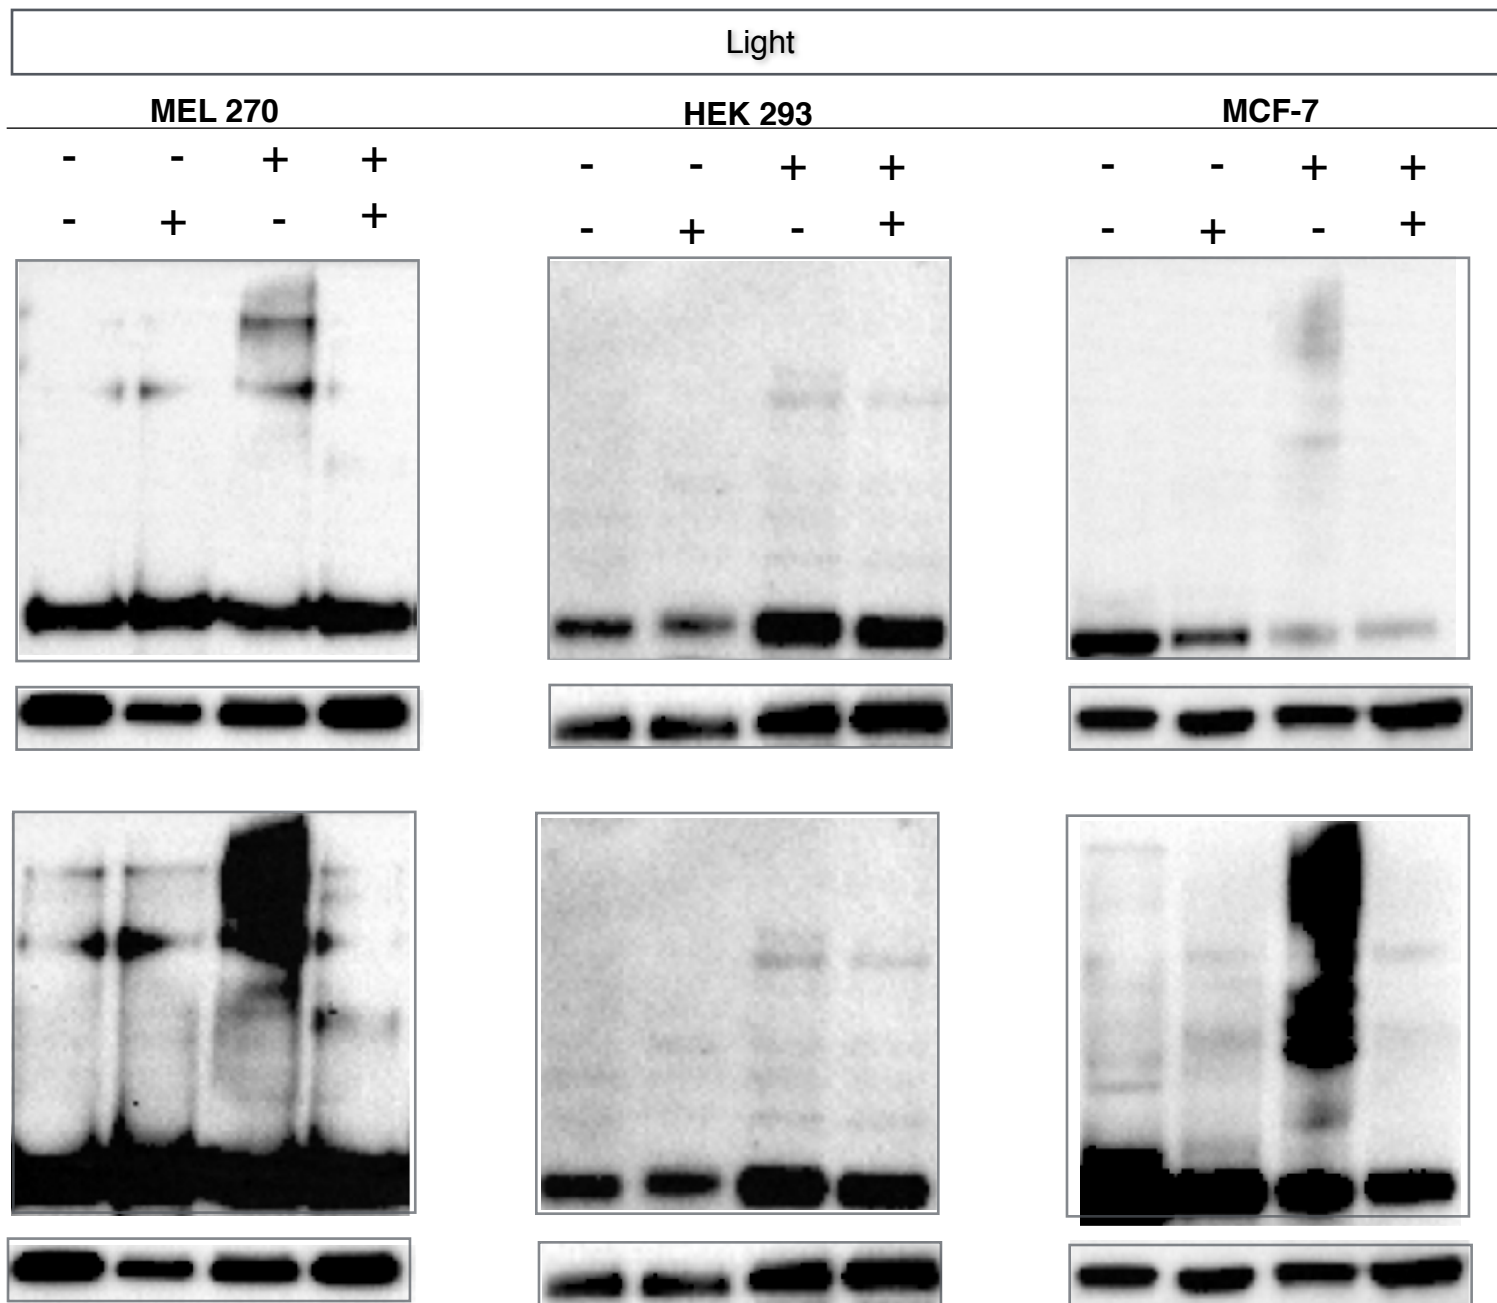

Lower exposure

Higher exposure

Fig. 4 (2/2) multiple exposures

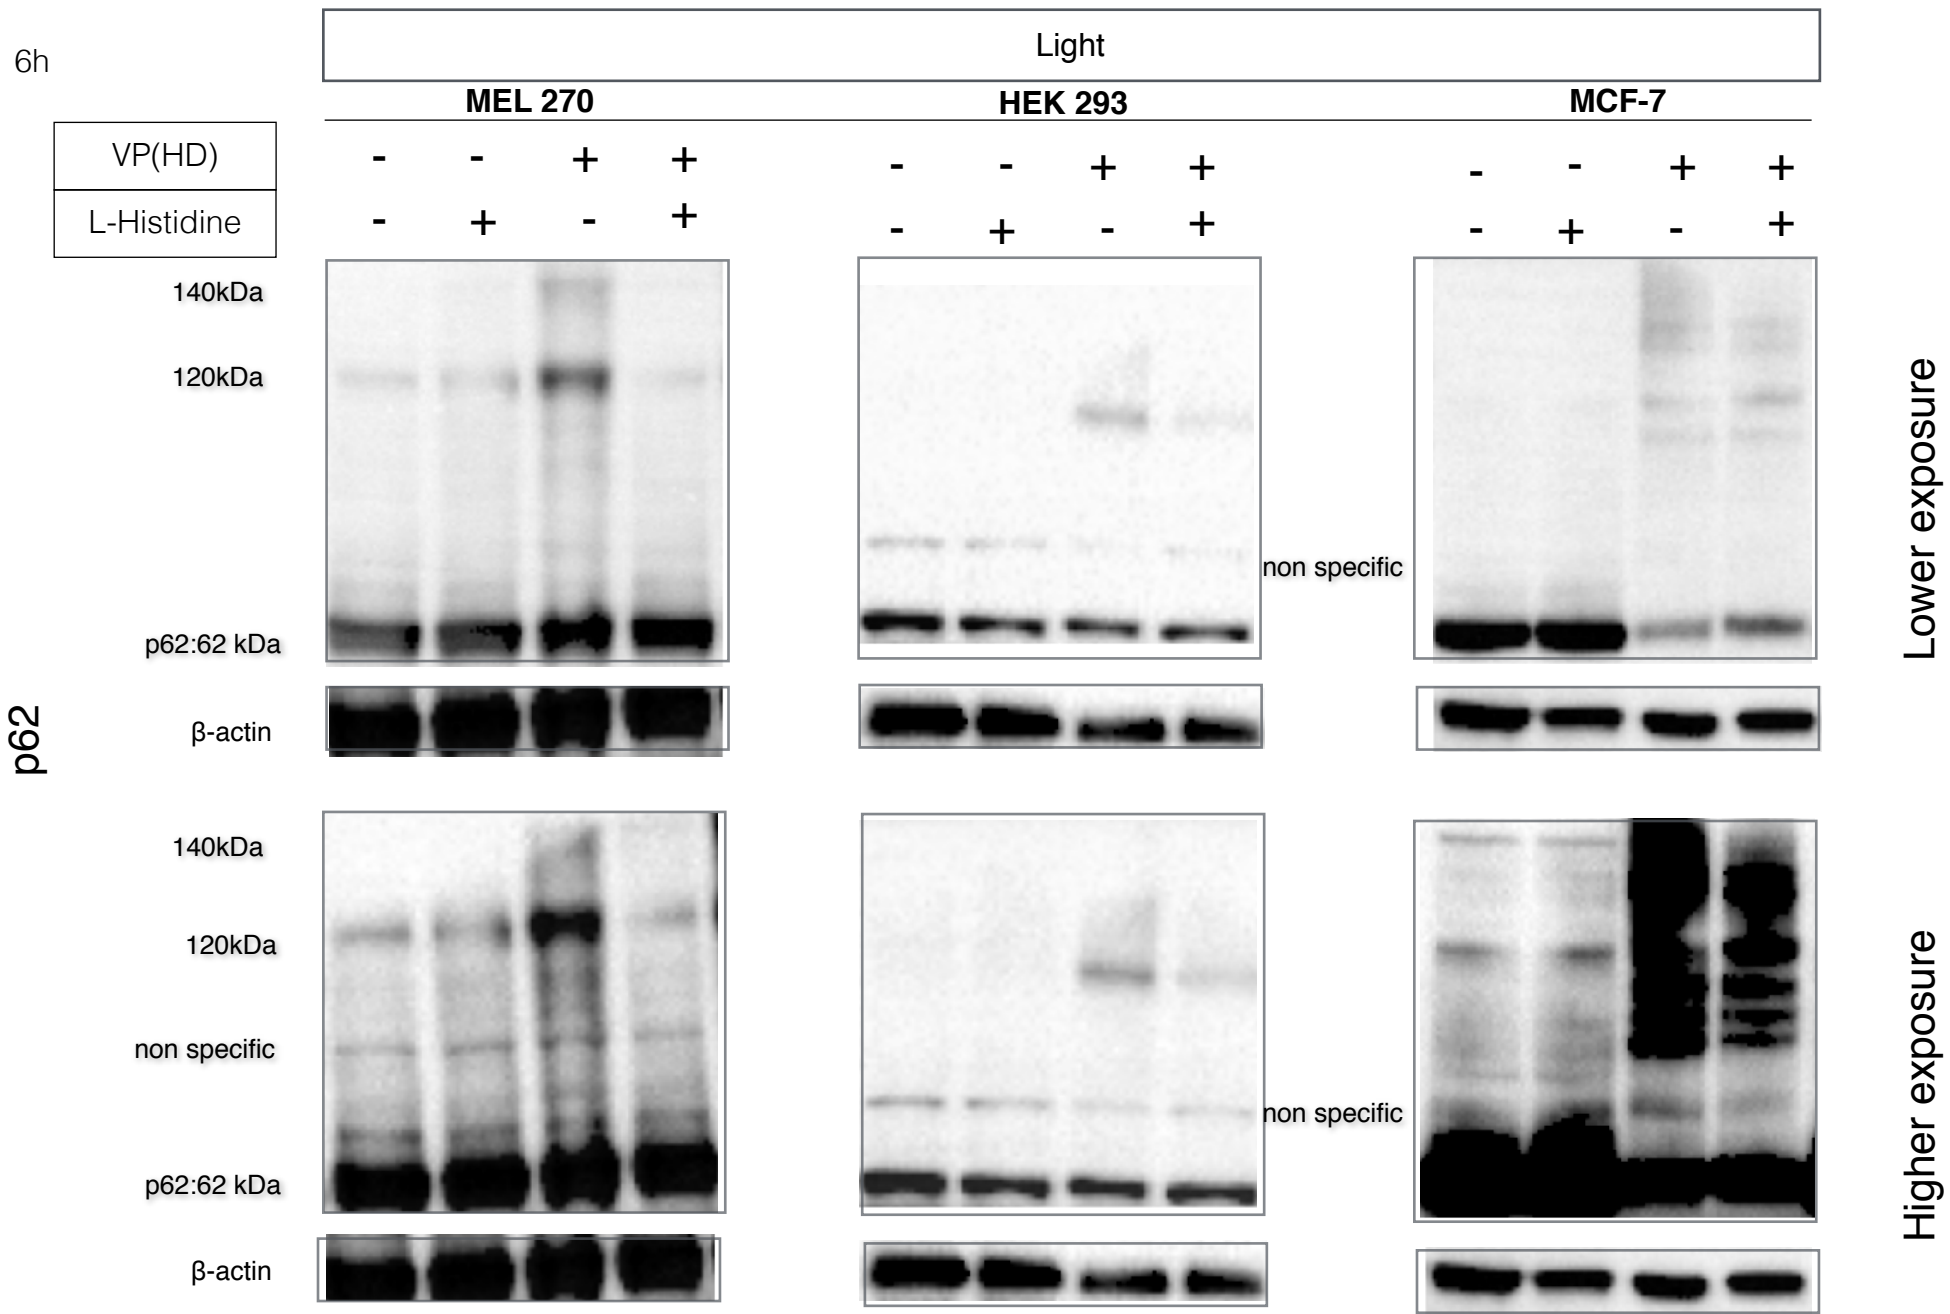

Supplement: srep46581-s1.pdf [file srep46581-s1.pdf]
